# Supplementary material for: Biocompatibility and Connectivity of Semiconductor Nanostructures for Cardiac Tissue Engineering Applications
Source: MDPI journal article supplement (doi:10.3390/bioengineering9110621), 2022-10-27
Supplement: s1 [file s1]

## Supplementary Figure S1

SEM images of Si samples coated with 10-nm-thick ZnO film and with additional wet growth of ZnO nanostructures by hydrothermal synthesis after 1 week incubation in (a) 0.25 mL, (b) 0.50 mL, (c) 1.0 mL, and (d) 2.0 mL cell culture media.

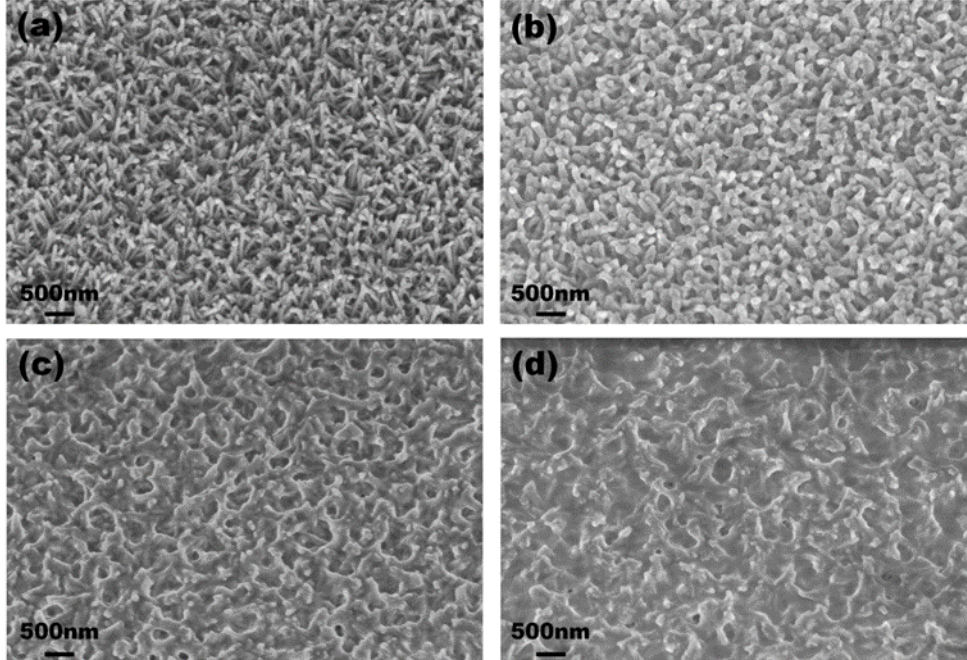

## Supplementary tables

Suppl. Table S1.

Absorbance measurements of Cardiac Stromal cells grown on tissue culture plastic (TC), ZnO-NanoWires coated Si wafer (ZnO-NWs 1h and 3.5h), ultra-thin ZnO film ('seed layer') on Si wafer (ZnO wafer), Si wafer ('seed layer') and Si-NanoWires coated Si wafer.

| AVERAGE      |      |               |               |               |               |               |
|--------------|------|---------------|---------------|---------------|---------------|---------------|
|              | days | baseline      | 2             | 4             | 7             | 10            |
| TC           |      | 0.067 ± 0.013 | 0.160 ± 0.032 | 0.170 ± 0.015 | 0.172 ± 0.018 | 0.205 ± 0.033 |
| ZnO wafer    |      | 0.060 ± 0.011 | 0.063 ± 0.013 | 0.126 ± 0.016 | 0.133 ± 0.014 | 0.183 ± 0.047 |
| ZnO NWs 1h   |      | 0.034 ± 0.006 | 0.046 ± 0.006 | 0.091 ± 0.007 | 0.094 ± 0.010 | 0.130 ± 0.031 |
| ZnO NWs 3.5h |      | 0.079 ± 0.020 | 0.084 ± 0.017 | 0.089 ± 0.016 | 0.085 ± 0.003 | 0.041 ± 0.002 |
| Si wafer     |      | 0.018 ± 0.004 | 0.041 ± 0.014 | 0.036 ± 0.019 | 0.149 ± 0.047 | 0.177 ± 0.075 |
| Si NWs       |      | 0.020 ± 0.002 | 0.042 ± 0.008 | 0.040 ± 0.016 | 0.132 ± 0.032 | 0.109 ± 0.015 |

Suppl. Table S2

Cardiac stromal cell viability 24h after incubation with cell culture media incubated with ZnO-NanoWires coated Si wafer (ZnO-NWs 1h and 3.5h) or ultra-thin ZnO film on Si wafer (ZnO wafer), Si wafer ('seed layer') and Si-NanoWires coated Si wafer for 3 days (table S2a) and for other 4 days (table S2b).

**Table S2a**

| <b>Conditioned media days 1-3</b> |                      |            |
|-----------------------------------|----------------------|------------|
|                                   | <b>viability (%)</b> | <b>SEM</b> |
| ZnO wafer 1 mL/cm <sup>2</sup>    | 17.61                | ± 6.82     |
| ZnO wafer 2 mL/cm <sup>2</sup>    | 25.57                | ± 8.96     |
| ZnO wafer 4 mL/cm <sup>2</sup>    | 67.88                | ±5.60      |
| ZnO-NWs 1h 1 mL/cm <sup>2</sup>   | 44.31                | ± 6.70     |
| ZnO-NWs 1h 2 mL/cm <sup>2</sup>   | 66.61                | ± 8.74     |
| ZnO-NWs 1h 4 mL/cm <sup>2</sup>   | 64.54                | ± 8.62     |
| ZnO NWs 3.5h 1 mL/cm <sup>2</sup> | 3.37                 | ± 2.31     |
| ZnO NWs 3.5h 2 mL/cm <sup>2</sup> | 2.23                 | ± 1.81     |
| ZnO NWs 3.5h 4 mL/cm <sup>2</sup> | 46.33                | ± 6.41     |
| ZnO NWs 3.5h 4 mL/cm <sup>2</sup> | 46.33                | ± 6.41     |
| Si wafer 1 mL/cm <sup>2</sup>     | 128.03               | ± 4.52     |
| Si wafer 2 mL/cm <sup>2</sup>     | 128.17               | ± 6.06     |
| Si wafer 4 mL/cm <sup>2</sup>     | 132.78               | ± 5.43     |
| Si NWs 1 mL/cm <sup>2</sup>       | 126.39               | ± 3.76     |
| Si NWs 2 mL/cm <sup>2</sup>       | 131.04               | ± 4.29     |
| Si NWs 4 mL/cm <sup>2</sup>       | 117.36               | ± 10.39    |

**Table S2b**

| <b>Conditioned media days 4-7</b> |                      |            |
|-----------------------------------|----------------------|------------|
|                                   | <b>viability (%)</b> | <b>SEM</b> |
| ZnO wafer 1 mL/cm <sup>2</sup>    | 18.26                | ± 6.40     |
| ZnO wafer 2 mL/cm <sup>2</sup>    | 43.74                | ± 13.28    |
| ZnO wafer 4 mL/cm <sup>2</sup>    | 85.33                | ± 8.03     |
| ZnO-NWs 1h 1 mL/cm <sup>2</sup>   | 55.95                | ± 18.07    |
| ZnO-NWs 1h 2 mL/cm <sup>2</sup>   | 56.33                | ± 11.69    |
| ZnO-NWs 1h 4 mL/cm <sup>2</sup>   | 64.31                | ± 13.83    |
| ZnO NWs 3.5h 1 mL/cm <sup>2</sup> | 5.19                 | ± 1.12     |
| ZnO NWs 3.5h 2 mL/cm <sup>2</sup> | 13.93                | ± 4.43     |
| ZnO NWs 3.5h 4 mL/cm <sup>2</sup> | 79.92                | ± 11.65    |
| Si wafer 1 mL/cm <sup>2</sup>     | 137.25               | ± 5.03     |
| Si wafer 2 mL/cm <sup>2</sup>     | 123.82               | ± 10.56    |
| Si wafer 4 mL/cm <sup>2</sup>     | 140.99               | ± 5.47     |
| Si NWs 1 mL/cm <sup>2</sup>       | 136.14               | ± 4.86     |
| Si NWs 2 mL/cm <sup>2</sup>       | 130.25               | ± 3.45     |
| Si NWs 4 mL/cm <sup>2</sup>       | 153.45               | ± 14.04    |
